# Supplementary material for: Mental State of Central Sterile Supply Department Staff During COVID-19 Epidemic and CART Analysis&nbsp;
Source: Research Square preprint supplement (doi:10.21203/rs.3.rs-37452/v4), 2020-10-27
Supplement: Supplementary file 1 [file 2eb5254aa51b8dfb57d65ef0.docx]

**Additional File**

**File name:** Additional file 1

**File format:** .docx

**Tile of data:** Questionnaire of perceived stress, anxiety and resilience of central sterile supply department staff during COVID-19 epidemic

**Description of data:** The questions about general information of the participant, COVID-19 epidemic and mental state of participant could be found in the questionnaire. The questionnaires were used to research the mental state of CSSD staff during COVID-10 epidemic.
